# Supplementary material for: Evaluation of a worldwide EQA scheme for complex clonality analysis of clinical lymphoproliferative cases demonstrates a learning effect
Source: Springer Nature journal article supplement (doi:10.1007/s00428-021-03046-0), 2021-03-08
Supplement: MOESM1 [file 18940496]

Title Evaluation of a worldwide EQA scheme for complex clonality analysis of clinical lymphoproliferative cases demonstrates a learning effect.

Journal Virchows Archiv

Authors Cleo Keppens, Elke Boone, Paula Gameiro, Véronique Tack, Elisabeth Moreau, Elizabeth Hodges, Paul Evans, Monika Brüggemann, Ian Carter, Dido Lenze, Maria Eugenia Sarasquete, Markus Möbs, Hongxiang Liu, Elisabeth MC Dequeker, Patricia JTA Groenen

Correspondence Dr. Patricia JTA Groenen  
Radboud University Medical Center  
Department of Pathology  
Geert Grootplein Zuid 10  
6525 GA Nijmegen, the Netherlands  
Email: Patricia.Groenen@radboudumc.nl

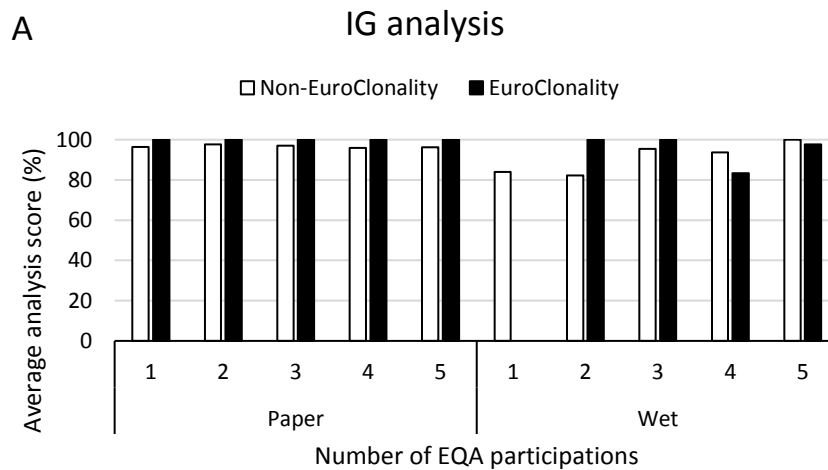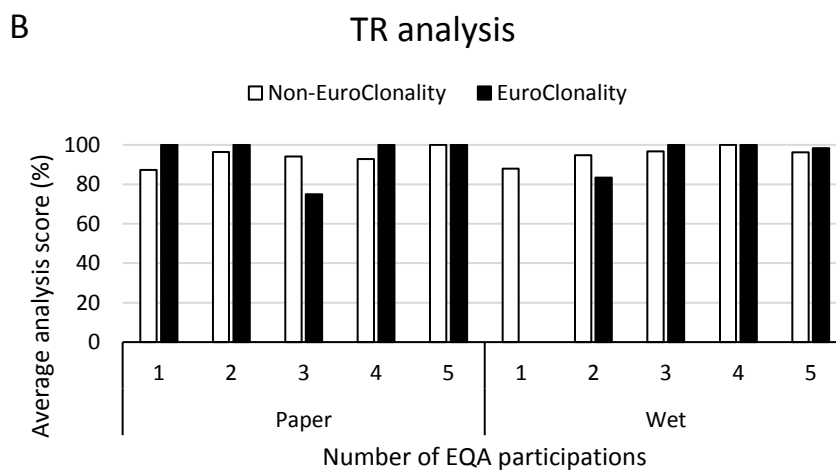

**Supplemental Figure 1. Performance of EuroClonality and non-EuroClonality laboratories for paper and wet IG (A) and TR (B) cases.**

Numbers represent the amount of EQA participations. All EuroClonality laboratories participated more than once in the wet cases and data is thus not available for EuroClonality labs who participated to only one scheme.
