# Supplementary material for: Evaluation of a worldwide EQA scheme for complex clonality analysis of clinical lymphoproliferative cases demonstrates a learning effect
Source: Springer Nature journal article supplement (doi:10.1007/s00428-021-03046-0), 2021-03-08
Supplement: MOESM3 [file 18940496]

Title Evaluation of a worldwide EQA scheme for complex clonality analysis of clinical lymphoproliferative cases demonstrates a learning effect.

Journal Virchows Archiv

Authors Cleo Keppens, Elke Boone, Paula Gameiro, Véronique Tack, Elisabeth Moreau, Elizabeth Hodges, Paul Evans, Monika Brüggemann, Ian Carter, Dido Lenze, Maria Eugenia Sarasquete, Markus Möbs, Hongxiang Liu, Elisabeth MC Dequeker, Patricia JTA Groenen

Correspondence Dr. Patricia JTA Groenen  
Radboud University Medical Center  
Department of Pathology  
Geert Grooteplein Zuid 10  
6525 GA Nijmegen, the Netherlands  
Email: Patricia.Groenen@radboudumc.nl

**Supplemental Table 2. Samples provided to participants per scheme year.**

| EQA year | EQA type | Subscheme         | Origin                                     | Final Clinical Diagnosis                               | Final Molecular interpretation                 | % Correct Results (# labs) |
|----------|----------|-------------------|--------------------------------------------|--------------------------------------------------------|------------------------------------------------|----------------------------|
| 2014     | Paper    | IG                | Bone marrow                                | Hairy Cell Leukemia                                    | Clonality detected                             | 98.4 (61/62)               |
|          |          |                   |                                            | Plasmablastic lymphoma                                 | Clonality detected                             | 100.0 (62/62)              |
|          |          |                   | Peripheral blood                           | Reactive lymphocytosis                                 | Polyclonality detected                         | 96.8 (60/62)               |
|          |          |                   |                                            | Mature B-cell neoplasm                                 | Clonality detected                             | 100.0 (62/62)              |
|          |          | Skin tissue fresh | Primary cutaneous follicle centre lymphoma | Clonality detected                                     | 95.2 (59/62)                                   |                            |
|          |          | TR                | Bone marrow                                | Mycosis fungoides (with extra-cutaneous dissemination) | Clonality detected                             | 96.7 (58/60)               |
|          |          |                   |                                            | Peripheral blood                                       | Sézary syndrome                                | Clonality detected         |
|          |          |                   | Skin tissue fresh                          | Mycosis fungoides                                      | Clonality detected                             | 96.7 (58/60)               |
|          |          |                   |                                            | Peripheral T-cell lymphoma, NOS                        | Polyclonality detected (no clonality detected) | 96.7 (58/60)               |
|          |          |                   |                                            | Mycosis fungoides                                      | Clonality detected                             | 100 (60/60)                |

**Supplemental Table 2 (Continued). Samples provided to participants per scheme year.**

| EQA year | EQA type | Subscheme | Origin               | Final Clinical Diagnosis                             | Final Molecular interpretation                                | % Correct Results (# labs) |
|----------|----------|-----------|----------------------|------------------------------------------------------|---------------------------------------------------------------|----------------------------|
| 2015     | Paper    | IG        | Spleen tissue FFPE   | Diffuse large B-cell lymphoma, NOS                   | Clonality detected                                            | 100.0 (57/57)              |
|          |          |           | Stomach tissue fresh | Chronic gastritis                                    | Oligoclonality/multiple clones detected or Clonality detected | 91.2 (52/57)               |
|          |          | TR*       | Lymph node FFPE      | Peripheral T-cell lymphoma, NOS                      | Clonality detected                                            | 100.0 (56/56)              |
|          |          |           | Peripheral blood     | Reactive lymphocytosis                               | Oligoclonality/multiple clones detected or Clonality detected | 94.6 (53/56)               |
|          | Wet      | IG        | Lymph node fresh     | Reactive lesion                                      | Polyclonality detected                                        | 94.7 (54/57)               |
|          |          |           |                      | Mature B-cell neoplasm                               | Clonality detected                                            | 94.7 (54/57)               |
|          |          |           | Lymph node FFPE      | Follicular lymphoma (with t(14;18) detected by FISH) | Clonality detected                                            | 91.2 (52/57)               |
|          |          | TR        | Lymph node fresh     | Reactive lesion                                      | Polyclonality detected (no clonality detected)                | 87.5 (49/56)               |
|          |          |           | Peripheral blood     | T-cell large granular lymphocytic leukemia           | Clonality detected                                            | 100.0 (56/56)              |
|          |          |           |                      |                                                      |                                                               |                            |
| 2016     | Paper    | IG        | Lachrymal node FFPE  | Reactive lesion                                      | Polyclonality detected                                        | 96.3 (52/54)               |
|          |          |           | Bone marrow          | Chronic Lymphocytic Leukemia                         | Clonality detected                                            | 100.0 (54/54)              |
|          |          |           | Skin tissue fresh    | Extranodal marginal zone B-cell lymphoma             | Clonality detected                                            | 100.0 (54/54)              |
|          |          | TR        | Peripheral blood     | Relapsed T-cell prolymphocytic leukemia              | Oligoclonality/multiple clones detected                       | 29.4 (15/51)               |
|          |          |           | Skin tissue fresh    | Mycosis fungoides                                    | Clonality detected                                            | 98.1 (50/51)               |

**Supplemental Table 2 (Continued). Samples provided to participants per scheme year.**

| EQA year | EQA type | Subscheme | Origin                  | Final Clinical Diagnosis                                                                                                                                 | Final Molecular interpretation | % Correct Results (# labs) |
|----------|----------|-----------|-------------------------|----------------------------------------------------------------------------------------------------------------------------------------------------------|--------------------------------|----------------------------|
| 2016     | Wet      | IG        | Bone marrow             | Multiple myeloma, relapse                                                                                                                                | Clonality detected             | 100.0 (54/54)              |
|          |          |           | Lymph node fresh        | Follicular lymphoma (with t(14;18) detected by FISH)                                                                                                     | Clonality detected             | 81.5 (44/54)               |
|          |          | TR        | Lymph node FFPE         | Reactive lesion                                                                                                                                          | Polyclonality detected         | 92.2 (47/51)               |
|          |          |           | Peripheral blood        | Relapsed T-cell acute lymphoblastic leukemia                                                                                                             | Clonality detected             | 98.1 (50/51)               |
|          |          |           |                         | Peripheral T-cell Non-Hodgkin Lymphoma, NOS                                                                                                              | Clonality detected             | 100.0 (51/51)              |
| 2017     | Paper    | IG        | Paravertebral mass FFPE | Diffuse large B-cell lymphoma, NOS                                                                                                                       | Clonality detected             | 100.0 (48/48)              |
|          |          |           | Bone marrow             | Monoclonal B-cell lymphocytosis                                                                                                                          | Clonality detected             | 100.0 (48/48)              |
|          |          | TR        | Bone marrow             | Large granular lymphocyte leukemia                                                                                                                       | Clonality detected             | 100.0 (47/47)              |
|          |          |           | Skin tissue FFPE        | Diagnosis not conclusive (early phase of parapsoriasis or mycosis fungoides could not be excluded) and further clinicopathological follow-up was advised | Polyclonality detected         | 100.0 (47/47)              |
|          |          |           | Skin tissue fresh       | Mycosis fungoides                                                                                                                                        | Clonality detected             | 80.9 (38/47)               |
|          | Wet      | IG        | Lymph node fresh        | Follicular lymphoma (with t(14;18) detected by FISH)                                                                                                     | Clonality detected             | 100.0 (48/48)              |
|          |          |           |                         | Reactive lesion                                                                                                                                          | Polyclonality detected         | 97.9 (47/48)               |
|          |          |           | Spleen tissue fresh     | Nodal marginal zone lymphoma (with transformation to large B-cell lymphoma)                                                                              | Clonality detected             | 100.0 (48/48)              |
|          |          | TR        | Bone marrow             | Reactive lesion                                                                                                                                          | Clonality detected             | 100.0 (47/47)              |
|          |          |           | Lymph node fresh        | Peripheral T-cell lymphoma, NOS                                                                                                                          | Clonality detected             | 97.9 (46/47)               |
|          |          |           |                         |                                                                                                                                                          |                                |                            |

**Supplemental Table 2 (Continued). Samples provided to participants per scheme year.**

| EQA year | EQA type | Subscheme | Origin                     | Final Clinical Diagnosis           | Final Molecular interpretation | % Correct Results (# labs) |
|----------|----------|-----------|----------------------------|------------------------------------|--------------------------------|----------------------------|
| 2018     | Paper    | IG        | Spleen tissue FFPE         | Diffuse large B-cell lymphoma, NOS | Clonality detected             | 100.0 (55/55)              |
|          |          |           | Tumour tissue FFPE         | Plasma cell neoplasm               | Clonality detected             | 92.7 (51/55)               |
|          |          |           | Umbilicus fresh            | Diffuse large B-cell lymphoma, NOS | Clonality detected             | 100.0 (55/55)              |
|          |          | TR        | Lymph node FFPE            | T-cell Prolymphocytic Leukemia     | Clonality detected             | 96.4 (53/55)               |
|          |          |           | Pleural fluid              | Peripheral T-cell lymphoma, NOS    | Clonality detected             | 100.0 (55/55)              |
|          | Wet      | IG        | Lymph node fresh           | Extraosseous plasmacytoma          | Clonality detected             | 100.0 (55/55)              |
|          |          |           | Thyroid gland isthmus FFPE | Reactive lesion                    | Polyclonality detected         | 94.5 (52/55)               |
|          |          | TR        | Lymph node fresh           | Peripheral T-cell lymphoma, NOS    | Clonality detected             | 100.0 (55/55)              |
|          |          |           |                            | Angioimmunoblastic T-cell lymphoma | Clonality detected             | 100.0 (55/55)              |
|          |          |           | Skin tissue FFPE           | Reactive lesion                    | Polyclonality detected         | 90.9 (50/55)               |

\*Data excludes one spleen tissue FFPE case (2015, paper TR case) with final clinical diagnosis of diffuse large B-cell lymphoma for which no consensus could be reached. Abbreviations: DLBCL, diffuse large B-cell lymphoma; EQA, external quality assessment; FFPE, formalin-fixed paraffin embedded; FISH, fluorescence in-situ hybridization; IG, immunoglobulin gene; N/A, not applicable; NOS, not otherwise specified; TR, T-cell receptor gene.
